# Supplementary material for: Comparing health care use after hospital visit for SARS-CoV-2, respiratory syncytial virus, and other respiratory tract infections in children
Source: bioRxiv or medRxiv preprint supplement (doi:10.1101/2021.11.22.21266522), 2022-05-31
Supplement: Supplementary file [file media-1.pdf]

## Supplementary material to:

### A comparison of health care use after severe COVID-19, respiratory syncytial virus, and influenza in children, Larsen et al. 2021

#### Table of contents

|                                                                                                                               |   |
|-------------------------------------------------------------------------------------------------------------------------------|---|
| <b>Figure S1:</b> Description of registries from within Beredt C19 used to define study population and outcome variables..... | 1 |
| <b>Figure S2:</b> Flowchart of study population.....                                                                          | 2 |
| <b>Table S1:</b> Selected International Classification of Diseases (ICD-10) codes and diagnosis categories..                  | 2 |
| <b>Table S2:</b> Descriptive statistics .....                                                                                 | 2 |
| <b>Table S3:</b> Crude percentages of health care use .....                                                                   | 3 |
| <b>Table S4:</b> All-cause outpatient care use .....                                                                          | 3 |
| <b>Table S5:</b> All-cause inpatient care use .....                                                                           | 3 |
| <b>Table S6:</b> Crude percentages of outpatient and inpatient specialist care use .....                                      | 3 |

**Figure S1:** Description of registries from within Beredt C19 used to define study population and outcome variables.

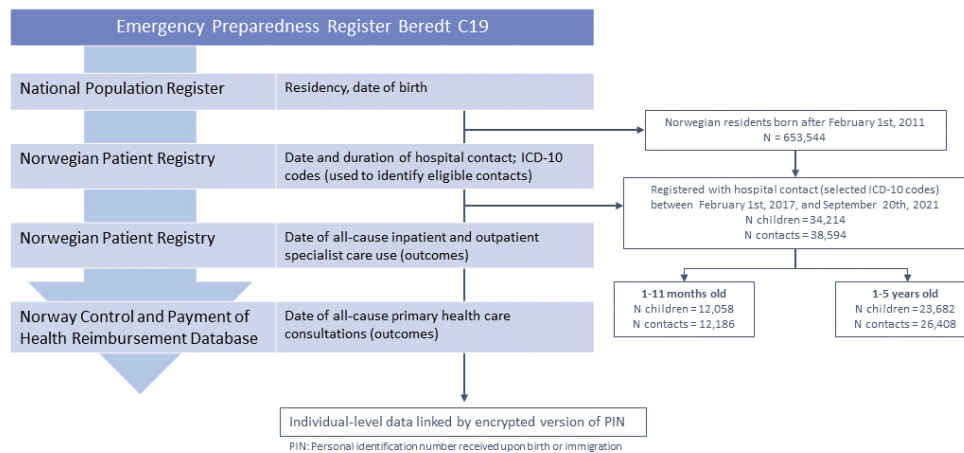

**Figure S2:** Flowchart of study population.

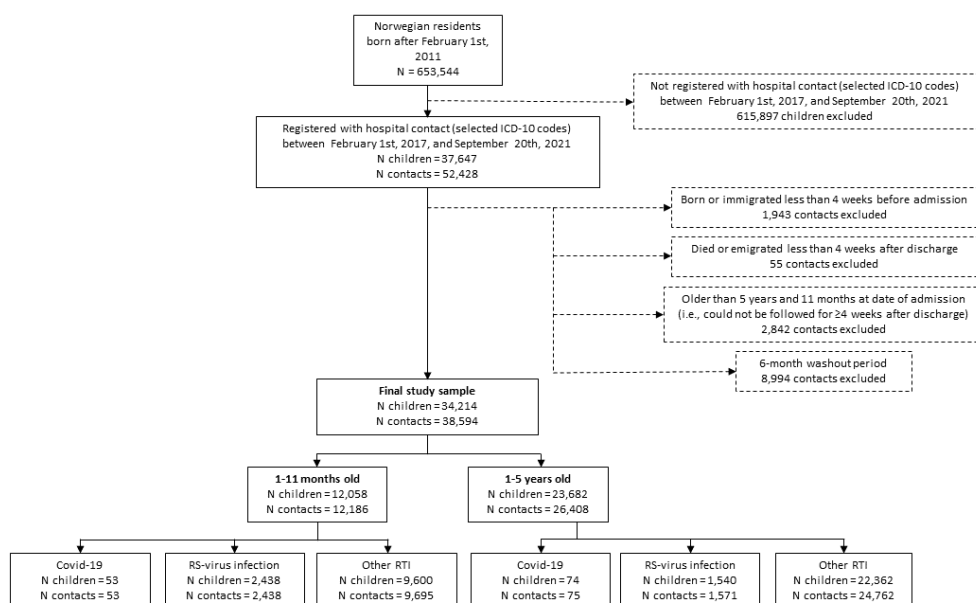

**Table S1:** Selected International Classification of Diseases (ICD-10) codes and diagnosis categories.

| Category      | ICD-10 codes                                                                                                                                                                                                                                                                                                                                                                    |
|---------------|---------------------------------------------------------------------------------------------------------------------------------------------------------------------------------------------------------------------------------------------------------------------------------------------------------------------------------------------------------------------------------|
| COVID-19      | U07.1 U07.2                                                                                                                                                                                                                                                                                                                                                                     |
| RSV infection | J12.1 J20.5 J21.0                                                                                                                                                                                                                                                                                                                                                               |
| Other RTI     | J00 J02.0 J02.8 J02.9 J03.0 J03.8 J03.9 J04.0 J04.1 J04.2 J05.0 J05.1 J06.0 J06.8<br>J06.9 J12.0 J12.2 J12.3 J12.8 J12.9 J13 J14 J15.0 J15.1 J15.2 J15.3 J15.4 J15.5 J15.6<br>J15.7 J15.8 J15.9 J16.0 J16.8 J17.0 J17.1 J17.2 J17.3 J17.8 J18.0 J18.1 J18.2 J18.8<br>J18.9 J22 J20.0 J20.1 J20.2 J20.3 J20.4 J20.6 J20.7 J20.8 J20.9 J09 J10.0 J10.1 J10.8<br>J11.0 J11.1 J11.8 |

**Table S2:** Descriptive statistics.

|                       | 1-12 months |              |              | 1-5 years      |               |               |
|-----------------------|-------------|--------------|--------------|----------------|---------------|---------------|
|                       | COVID-19    | RSV          | Other RTI    | COVID-19       | RSV           | Other RTI     |
| Children, N           |             |              | 34,214       |                |               |               |
| Children, N           |             | 12,058       |              |                | 23,682        |               |
| Children, N           | 53          | 2,438        | 9,600        | 74             | 1,540         | 22,362        |
| Contacts, N           | 53          | 2,438        | 9,695        | 75             | 1,571         | 24,762        |
| Person-weeks, N       | 1,141       | 53,346       | 220,617      | 1,742          | 37,824        | 607,009       |
| Females, N (%)        | 23 (43.4)   | 1,072 (44.0) | 3,975 (41.0) | 33 (44.0)      | 670 (42.6)    | 10,313 (41.6) |
| Age, median [25%-75%] | 2 [2-4]     | 2 [1-5]      | 3 [2-7]      | 2.4 [1.55-3.5] | 1.6 [1.2-2.3] | 2.1 [1.4-3.2] |

Note: Age presented as median and interquartile range (IQR) age in months/years at admission. The calculation of age and sex percentages are done using the number unique hospital contacts in the denominator. Due to the 6-month washout period, some children appear in >1 of the age and/or diagnosis groups.

**Table S3:** Crude percentages of health care use.

| Week | 1-12 months |       |       |      |           |       | 1-5 years |       |       |      |           |      |
|------|-------------|-------|-------|------|-----------|-------|-----------|-------|-------|------|-----------|------|
|      | COVID-19    |       | RSV   |      | Other RTI |       | COVID-19  |       | RSV   |      | Other RTI |      |
|      | P           | S     | P     | S    | P         | S     | P         | S     | P     | S    | P         | S    |
| Pre  | 11.76       | 9.68  | 12.21 | 9.26 | 10.83     | 10.98 | 6.00      | 6.67  | 12.95 | 5.64 | 10.33     | 5.82 |
| 1-4  | 16.04       | 10.85 | 9.44  | 8.25 | 10.39     | 10.3  | 11.67     | 12.33 | 10.26 | 9.55 | 10.85     | 9.45 |
| 5-8  | 8.38        | 5.24  | 7.52  | 4.69 | 8.65      | 7.16  | 6.02      | 7.23  | 8.29  | 7.57 | 7.74      | 7.41 |
| 9-12 | 6.96        | 5.70  | 7.62  | 3.45 | 8.26      | 6.10  | 3.21      | 5.50  | 7.42  | 6.76 | 7.19      | 6.97 |

Note: Weekly percentages of children utilizing primary (P) and specialist (S) health care in the 12-week pre-admission period (pre) and 1-4-, 5-8-, and 9-12-week post-discharge period.

**Table S4:** All-cause outpatient care use

|                    | Week 1-4 |              | Week 5-8 |              | Week 9-12 |              |
|--------------------|----------|--------------|----------|--------------|-----------|--------------|
|                    | $\beta$  | 95 % CI      | $\beta$  | 95 % CI      | $\beta$   | 95 % CI      |
| <b>1-12 months</b> |          |              |          |              |           |              |
| RSV infection      | 0.025    | -0.023-0.072 | -0.008   | -0.076-0.06  | 0.012     | -0.062-0.086 |
| Other RTI          | 0.017    | -0.025-0.06  | -0.015   | -0.073-0.044 | 0.002     | -0.062-0.065 |
| <b>1-5 years</b>   |          |              |          |              |           |              |
| RSV infection      | 0        | -0.035-0.035 | -0.019   | -0.061-0.023 | -0.018    | -0.062-0.026 |
| Other RTI          | 0.006    | -0.028-0.04  | -0.021   | -0.064-0.022 | -0.028    | -0.066-0.011 |

**Table S5:** All-cause inpatient care use

|                    | Week 1-4 |              | Week 5-8 |              | Week 9-12 |              |
|--------------------|----------|--------------|----------|--------------|-----------|--------------|
|                    | $\beta$  | 95 % CI      | $\beta$  | 95 % CI      | $\beta$   | 95 % CI      |
| <b>1-12 months</b> |          |              |          |              |           |              |
| RSV infection      | 0.044    | 0.012-0.076  | 0.037    | 0.004-0.069  | 0.038     | 0.001-0.076  |
| Other RTI          | 0.021    | -0.005-0.048 | 0.019    | -0.007-0.044 | 0.03      | -0.002-0.062 |
| <b>1-5 years</b>   |          |              |          |              |           |              |
| RSV infection      | 0.002    | -0.029-0.033 | -0.001   | -0.033-0.031 | -0.006    | -0.035-0.023 |
| Other RTI          | 0.002    | -0.028-0.033 | 0.001    | -0.033-0.035 | -0.007    | -0.033-0.02  |

**Table S6:** Crude percentages of outpatient and inpatient specialist care use

| Week | 1-12 months |      |      |      |           |      | 1-5 years |      |      |      |           |      |
|------|-------------|------|------|------|-----------|------|-----------|------|------|------|-----------|------|
|      | COVID-19    |      | RSV  |      | Other RTI |      | COVID-19  |      | RSV  |      | Other RTI |      |
|      | O           | I    | O    | I    | O         | I    | O         | I    | O    | I    | O         | I    |
| Pre  | 6.83        | 4.36 | 5.51 | 4.62 | 6.69      | 5.50 | 5.89      | 1.67 | 4.67 | 1.17 | 4.85      | 1.34 |
| 1-4  | 9.43        | 4.25 | 6.51 | 2.03 | 7.85      | 3.36 | 9.67      | 3.33 | 7.77 | 2.31 | 7.48      | 2.62 |
| 5-8  | 4.19        | 2.62 | 3.66 | 1.16 | 5.62      | 2.09 | 5.62      | 2.41 | 5.86 | 2.03 | 6.10      | 1.83 |
| 9-12 | 5.06        | 3.16 | 2.66 | 0.88 | 4.87      | 1.62 | 4.13      | 1.38 | 5.44 | 1.56 | 5.82      | 1.59 |

Note: Weekly percentages of children utilizing outpatient (O) and inpatient (I) specialist health care in the 12-week pre-admission period (pre) and 1-4-, 5-8-, and 9-12-week post-discharge period.
